# Supplementary material
Source: MDPI journal article supplement (https://www.mdpi.com/1999-4907/14/9/1778)
Supplement: s1 [file s1]

**Table S1.** Genes contents in the *C. monoica* and *C. sinensis* chloroplast genomes

| Category                    | Gene groups                      | Gene Names                                                                                                                                                                                                                                                                                                                                                                                                                                                                                                                                                                                                                                                                                                 |
|-----------------------------|----------------------------------|------------------------------------------------------------------------------------------------------------------------------------------------------------------------------------------------------------------------------------------------------------------------------------------------------------------------------------------------------------------------------------------------------------------------------------------------------------------------------------------------------------------------------------------------------------------------------------------------------------------------------------------------------------------------------------------------------------|
| <b>RNA genes</b>            | Transfer RNA genes (tRNA)        | <i>trnA-UGC</i> <sup>a</sup> , <i>trnC-GCA</i> , <i>trnD-GUC</i> , <i>trnE-UUC</i> , <i>trnF-GAA</i> , <i>trnG-CAU</i> , <i>trnG-GCC</i> , <i>trnG-UCC</i> <sup>+</sup> , <i>trnH-GUG</i> , <i>trnI-CAU</i> <sup>+,a</sup> , <i>trnI-GAU</i> <sup>a</sup> , <i>trnK-UUU</i> <sup>+</sup> , <i>trnL-CAA</i> <sup>a</sup> , <i>trnL-UAA</i> <sup>+</sup> , <i>trnL-UAG</i> , <i>trnM-CAU</i> , <i>trnN-GUU</i> <sup>a</sup> , <i>trnP-UGG</i> , <i>trnQ-UUG</i> , <i>trnR-ACG</i> <sup>a</sup> , <i>trnR-UCU</i> , <i>trnS-GCU</i> , <i>trnS-GGA</i> , <i>trnS-UGA</i> , <i>trnT-GGU</i> , <i>trnT-UGU</i> , <i>trnV-GAC</i> <sup>a</sup> , <i>trnV-UAC</i> <sup>+</sup> , <i>trnW-CCA</i> , <i>trnY-GUA</i> |
|                             | Ribosomal RNA genes (rRNA)       | <i>rrn4.5</i> <sup>a</sup> , <i>rrn5</i> <sup>a</sup> , <i>rrn16</i> <sup>a</sup> , <i>rrn23</i> <sup>a</sup>                                                                                                                                                                                                                                                                                                                                                                                                                                                                                                                                                                                              |
| <b>Ribosomal proteins</b>   | Small sub-unit of ribosome       | <i>rps2</i> , <i>rps3</i> , <i>rps4</i> , <i>rps7</i> <sup>a</sup> , <i>rps8</i> , <i>rps11</i> , <i>rps12</i> <sup>+,a</sup> , <i>rps14</i> , <i>rps15</i> , <i>rps16</i> <sup>+</sup> , <i>rps18</i> , <i>rps19</i>                                                                                                                                                                                                                                                                                                                                                                                                                                                                                      |
| <b>Transcription Genes</b>  | Large sub-unit of ribosome       | <i>rpl2</i> <sup>+,a</sup> , <i>rpl14</i> , <i>rpl16</i> <sup>+</sup> , <i>rpl20</i> , <i>rpl22</i> , <i>rpl23</i> <sup>a</sup> , <i>rpl32</i> , <i>rpl33</i> , <i>rpl36</i>                                                                                                                                                                                                                                                                                                                                                                                                                                                                                                                               |
|                             | DNA-dependent RNA polymerase     | <i>rpoA</i> , <i>rpoB</i> , <i>rpoC1</i> <sup>+</sup> , <i>rpoC2</i>                                                                                                                                                                                                                                                                                                                                                                                                                                                                                                                                                                                                                                       |
| <b>Protein-coding genes</b> | Photosystem I                    | <i>psaA</i> , <i>psaB</i> , <i>psaC</i> , <i>psaI</i> , <i>psaJ</i> , <i>ycf3</i> <sup>++</sup>                                                                                                                                                                                                                                                                                                                                                                                                                                                                                                                                                                                                            |
|                             | Photosystem II                   | <i>psbA</i> , <i>psbB</i> , <i>psbC</i> , <i>psbD</i> , <i>psbE</i> , <i>psbF</i> , <i>psbH</i> , <i>psbI</i> , <i>psbJ</i> , <i>psbK</i> , <i>psbL</i> , <i>psbM</i> , <i>psbN</i> , <i>psbT</i> , <i>psbZ</i>                                                                                                                                                                                                                                                                                                                                                                                                                                                                                            |
|                             | Sub-unit of cytochrome           | <i>petA</i> , <i>petB</i> <sup>+</sup> , <i>petD</i> <sup>+</sup> , <i>petG</i> , <i>petL</i> , <i>petN</i>                                                                                                                                                                                                                                                                                                                                                                                                                                                                                                                                                                                                |
|                             | Sub-unit of synthase             | <i>atpA</i> , <i>atpB</i> , <i>atpE</i> , <i>atpF</i> <sup>+</sup> , <i>atpH</i> , <i>atpI</i>                                                                                                                                                                                                                                                                                                                                                                                                                                                                                                                                                                                                             |
|                             | Large sub-unit of rubisco        | <i>rbcL</i>                                                                                                                                                                                                                                                                                                                                                                                                                                                                                                                                                                                                                                                                                                |
|                             | NADH dehydrogenase               | <i>ndhA</i> <sup>+</sup> , <i>ndhB</i> <sup>+,a</sup> , <i>ndhC</i> , <i>ndhD</i> , <i>ndhE</i> , <i>ndhF</i> , <i>ndhG</i> , <i>ndhH</i> , <i>ndhI</i> , <i>ndhJ</i> , <i>ndhK</i>                                                                                                                                                                                                                                                                                                                                                                                                                                                                                                                        |
|                             | ATP-dependent protease subunit P | <i>clpP</i> <sup>+</sup>                                                                                                                                                                                                                                                                                                                                                                                                                                                                                                                                                                                                                                                                                   |
| <b>Other genes</b>          | Cp envelope membrane protein     | <i>cemA</i>                                                                                                                                                                                                                                                                                                                                                                                                                                                                                                                                                                                                                                                                                                |
|                             | C-type cytochrome synthesis      | <i>ccsA</i>                                                                                                                                                                                                                                                                                                                                                                                                                                                                                                                                                                                                                                                                                                |
|                             | Translation initiation factor,   | <i>infA</i>                                                                                                                                                                                                                                                                                                                                                                                                                                                                                                                                                                                                                                                                                                |
|                             | Maturase                         | <i>matK</i>                                                                                                                                                                                                                                                                                                                                                                                                                                                                                                                                                                                                                                                                                                |
|                             | Sub-unit acetyl-coA carboxylase  | <i>accD</i>                                                                                                                                                                                                                                                                                                                                                                                                                                                                                                                                                                                                                                                                                                |
|                             | Hypothetical proteins            | <i>ycf2</i> <sup>a</sup> , <i>ycf4</i> , <i>ycf15</i> <sup>a</sup>                                                                                                                                                                                                                                                                                                                                                                                                                                                                                                                                                                                                                                         |
|                             | Component of TIC complex         | <i>ycf1</i> <sup>a</sup>                                                                                                                                                                                                                                                                                                                                                                                                                                                                                                                                                                                                                                                                                   |

<sup>a</sup> Gene with multiple copies; <sup>+</sup>Gene with one intron and <sup>++</sup>Gene with two introns

**Table S2.** Exons and introns lengths in *C. monoica* and *C. sinensis* chloroplast genomes

| Gene            | Location | Exon I<br>(bp) |             | Intron I<br>(bp) |             | Exon II<br>(bp) |             | Intron II<br>(bp) |             | Exon III<br>(bp) |             |
|-----------------|----------|----------------|-------------|------------------|-------------|-----------------|-------------|-------------------|-------------|------------------|-------------|
|                 |          | <i>C. m</i>    | <i>C. s</i> | <i>C. m</i>      | <i>C. s</i> | <i>C. m</i>     | <i>C. s</i> | <i>C. m</i>       | <i>C. s</i> | <i>C. m</i>      | <i>C. s</i> |
| <i>atpF</i>     | LSC      | 410            | 410         | 696              | 693         | 143             | 143         |                   |             |                  |             |
| <i>clpP1</i>    | LSC      | 287            | 287         | 291              | 291         | 70              | 70          |                   |             |                  |             |
| <i>ndhA</i>     | SSC      | 541            | 541         | 1037             | 1039        | 552             | 552         |                   |             |                  |             |
| <i>ndhB</i>     | IR       | 757            | 757         | 678              | 678         | 774             | 774         |                   |             |                  |             |
| <i>petB</i>     | LSC      | 5              | 5           | 805              | 801         | 641             | 641         |                   |             |                  |             |
| <i>petD</i>     | LSC      | 7              | 7           | 742              | 741         | 474             | 474         |                   |             |                  |             |
| <i>rpl16</i>    | LSC      | 398            | 398         | 1030             | 1030        | 8               | 8           |                   |             |                  |             |
| <i>rpl2</i>     | IR       | 433            | 433         | 661              | 661         | 390             | 390         |                   |             |                  |             |
| <i>rpoC1</i>    | LSC      | 1610           | 1610        | 736              | 743         | 431             | 431         |                   |             |                  |             |
| <i>rps12</i>    | IR       | 25             | 25          | 539              | 539         | 231             | 231         |                   |             |                  |             |
| <i>rps16</i>    | LSC      | 208            | 208         | 870              | 870         | 39              | 39          |                   |             |                  |             |
| <i>trnA-UGC</i> | IR       | 37             | 37          | 798              | 798         | 34              | 34          |                   |             |                  |             |
| <i>trnG-UCC</i> | LSC      | 22             | 22          | 684              | 685         | 47              | 47          |                   |             |                  |             |
| <i>trnI-GAU</i> | IR       | 36             | 36          | 946              | 946         | 34              | 34          |                   |             |                  |             |
| <i>trnK-UUU</i> | LSC      | 34             | 34          | 2460             | 2463        | 36              | 36          |                   |             |                  |             |
| <i>trnL-UAA</i> | LSC      | 34             | 34          | 490              | 490         | 49              | 49          |                   |             |                  |             |
| <i>trnV-UAC</i> | LSC      | 36             | 36          | 585              | 585         | 35              | 35          |                   |             |                  |             |
| <i>ycf3</i>     | LSC      | 154            | 154         | 750              | 745         | 227             | 227         | 727               | 736         | 123              | 123         |

**Table S3.** Codon-anticodon recognition patterns and codon usage of the *C. monoica* chloroplast genome

| Codon | Amino Acid | RSCU | tRNA     | Codon | Amino Acid | RSCU | tRNA     |
|-------|------------|------|----------|-------|------------|------|----------|
| UUU   | Phe        | 1.24 | trnF-GAA | UAU   | Tyr        | 1.29 | trnY-GUA |
| UUC   | Phe        | 0.76 |          | UAC   | Tyr        | 0.71 |          |
| UUA   | Leu        | 1.3  | trnL-UAA | UAA   | Stop       | 1.01 |          |
| UUG   | Leu        | 1.37 | trnL-CAA | UAG   | Stop       | 0.85 |          |
| CUU   | Leu        | 1.28 | trnL-UAG | CAU   | His        | 1.31 | trnH-GUG |
| CUC   | Leu        | 0.65 |          | CAC   | His        | 0.69 |          |
| CUA   | Leu        | 0.82 |          | CAA   | Gln        | 1.32 | trnQ-UUG |
| CUG   | Leu        | 0.59 |          | CAG   | Gln        | 0.68 |          |
| AUU   | Ile        | 1.41 | trnI-GAU | AAU   | Asn        | 1.3  | trnN-GUU |
| AUC   | Ile        | 0.83 |          | AAC   | Asn        | 0.7  |          |
| AUA   | Ile        | 0.75 | trnI-CAU | AAA   | Lys        | 1.27 | trnK-UUU |
| AUG   | Met        | 1    | trnM-CAU | AAG   | Lys        | 0.73 |          |
| GUU   | Val        | 1.4  | trnV-GAC | GAU   | Asp        | 1.37 | trnD-GUC |
| GUC   | Val        | 0.83 |          | GAC   | Asp        | 0.63 |          |
| GUA   | Val        | 1.1  |          | GAA   | Glu        | 1.33 | trnE-UUC |
| GUG   | Val        | 0.67 | trnV-UAC | GAG   | Glu        | 0.67 |          |
| UCU   | Ser        | 1.34 | trnS-GGA | UGU   | Cys        | 1.11 | trnC-GCA |
| UCC   | Ser        | 0.9  |          | UGC   | Cys        | 0.89 |          |
| UCA   | Ser        | 1.42 |          | UGA   | Stop       | 1.14 |          |
| UCG   | Ser        | 0.79 | trnS-UGA | UGG   | Trp        | 1    | trnW-CCA |
| CCU   | Pro        | 1.06 | trnP-UGG | CGU   | Arg        | 0.62 | trnR-ACG |
| CCC   | Pro        | 0.91 |          | CGC   | Arg        | 0.35 | trnR-UCU |
| CCA   | Pro        | 1.2  |          | CGA   | Arg        | 0.99 |          |
| CCG   | Pro        | 0.82 |          | CGG   | Arg        | 0.76 |          |
| ACU   | Thr        | 1    |          | AGA   | Arg        | 1.99 |          |
| ACC   | Thr        | 0.98 |          | AGG   | Arg        | 1.29 |          |
| ACA   | Thr        | 1.26 | trnT-GGU | AGU   | Ser        | 0.76 | trnS-GCU |
| ACG   | Thr        | 0.75 | trnT-UGU | AGC   | Ser        | 0.78 |          |
| GCU   | Ala        | 1.16 | trnA-UGC | GGU   | Gly        | 0.88 | trnG-GCC |
| GCC   | Ala        | 0.87 |          | GGC   | Gly        | 0.66 |          |
| GCA   | Ala        | 1.19 |          | GGA   | Gly        | 1.32 |          |
| GCG   | Ala        | 0.78 |          | GGG   | Gly        | 1.13 | trnG-UCC |

**Table S4.** Codon-anticodon recognition patterns and codon usage of the *C. sinensis* chloroplast genome

| Codon | Amino Acid | RSCU | tRNA     | Codon | Amino Acid | RSCU | tRNA     |
|-------|------------|------|----------|-------|------------|------|----------|
| UUU   | Phe        | 1.21 | trnF-GAA | UAU   | Tyr        | 1.33 | trnY-GUA |
| UUC   | Phe        | 0.79 |          | UAC   | Tyr        | 0.67 |          |
| UUA   | Leu        | 1.17 | trnL-UAA | UAA   | Stop       | 0.97 |          |
| UUG   | Leu        | 1.38 | trnL-CAA | UAG   | Stop       | 0.98 |          |
| CUU   | Leu        | 1.25 | trnL-UAG | CAU   | His        | 1.29 | trnH-GUG |
| CUC   | Leu        | 0.71 |          | CAC   | His        | 0.71 |          |
| CUA   | Leu        | 0.87 |          | CAA   | Gln        | 1.3  | trnQ-UUG |
| CUG   | Leu        | 0.63 |          | CAG   | Gln        | 0.7  |          |
| AUU   | Ile        | 1.33 | trnI-GAU | AAU   | Asn        | 1.29 | trnN-GUU |
| AUC   | Ile        | 0.77 |          | AAC   | Asn        | 0.71 |          |
| AUA   | Ile        | 0.9  | trnI-CAU | AAA   | Lys        | 1.27 | trnK-UUU |
| AUG   | Met        | 1    | trnM-CAU | AAG   | Lys        | 0.73 |          |
| GUU   | Val        | 1.26 | trnV-GAC | GAU   | Asp        | 1.44 | trnD-GUC |
| GUC   | Val        | 0.83 |          | GAC   | Asp        | 0.56 |          |
| GUA   | Val        | 1.17 |          | GAA   | Glu        | 1.33 | trnE-UUC |
| GUG   | Val        | 0.73 | trnV-UAC | GAG   | Glu        | 0.67 |          |
| UCU   | Ser        | 1.52 | trnS-GGA | UGU   | Cys        | 1.25 | trnC-GCA |
| UCC   | Ser        | 0.91 |          | UGC   | Cys        | 0.75 |          |
| UCA   | Ser        | 1.3  |          | UGA   | Stop       | 1.06 |          |
| UCG   | Ser        | 0.75 | trnS-UGA | UGG   | Trp        | 1    | trnW-CCA |
| CCU   | Pro        | 1.11 | trnP-UGG | CGU   | Arg        | 0.79 | trnR-ACG |
| CCC   | Pro        | 0.89 |          | CGC   | Arg        | 0.37 | trnR-UCU |
| CCA   | Pro        | 1.17 |          | CGA   | Arg        | 1.06 |          |
| CCG   | Pro        | 0.83 |          | CGG   | Arg        | 0.79 |          |
| ACU   | Thr        | 1.2  |          | AGA   | Arg        | 1.85 |          |
| ACC   | Thr        | 0.97 |          | AGG   | Arg        | 1.14 |          |
| ACA   | Thr        | 1.18 | trnT-GGU | AGU   | Ser        | 0.83 | trnS-GCU |
| ACG   | Thr        | 0.65 | trnT-UGU | AGC   | Ser        | 0.68 |          |
| GCU   | Ala        | 1.44 | trnA-UGC | GGU   | Gly        | 1.03 | trnG-GCC |
| GCC   | Ala        | 0.75 |          | GGC   | Gly        | 0.56 |          |
| GCA   | Ala        | 1.08 |          | GGA   | Gly        | 1.3  |          |
| GCG   | Ala        | 0.73 |          | GGG   | Gly        | 1.11 | trnG-UCC |

**Table S5.** Predicted RNA editing site in the *C. monoica* and *C. sinensis* chloroplast genome.

| Gene         | Nucleotide position | Amino acid position | Triplet position within codon | Base conversion | Codon change | Amino acid conversion |
|--------------|---------------------|---------------------|-------------------------------|-----------------|--------------|-----------------------|
| <i>atpA</i>  | 791                 | 264                 | 2                             | C→U             | CCC→CUC      | P→L                   |
| <i>atpF</i>  | 92                  | 31                  | 2                             | C→U             | CCA→CUA      | P→L                   |
| <i>rps2</i>  | 248                 | 83                  | 2                             | C→U             | UCA→UUA      | S→L                   |
| <i>rpoC2</i> | 3731                | 1244                | 2                             | C→U             | UCA→UUA      | S→L                   |
| <i>rpoB</i>  | 338                 | 113                 | 2                             | C→U             | UCU→UUU      | S→F                   |
|              | 551                 | 184                 | 2                             | C→U             | UCA→UUA      | S→L                   |
|              | 2426                | 809                 | 2                             | C→U             | UCA→UUA      | S→L                   |
| <i>rps14</i> | 80                  | 27                  | 2                             | C→U             | UCA→UUA      | S→L                   |
|              | 149                 | 50                  | 2                             | C→U             | CCA→CUA      | P→L                   |
| <i>psbL</i>  | 2                   | 1                   | 2                             | C→U             | ACG→AUG      | T→M                   |
| <i>petB</i>  | 611                 | 204                 | 2                             | C→U             | CCA→CUA      | P→L                   |
| <i>rpoA</i>  | 200                 | 67                  | 2                             | C→U             | UCU→UUU      | S→F                   |
|              | 830                 | 277                 | 2                             | C→U             | UCA→UUA      | S→L                   |
| <i>rpl23</i> | 71                  | 24                  | 2                             | C→U             | UCU→UUU      | S→F                   |
|              | 89                  | 30                  | 2                             | C→U             | UCA→UUA      | S→L                   |
| <i>ndhB</i>  | 467                 | 156                 | 2                             | C→U             | CCA→CUA      | P→L                   |
|              | 586                 | 196                 | 1                             | C→U             | CAU→UAU      | H→Y                   |
|              | 611                 | 204                 | 2                             | C→U             | UCA→UUA      | S→L                   |
|              | 737                 | 246                 | 2                             | C→U             | CCA→CUA      | P→L                   |
|              | 746                 | 249                 | 2                             | C→U             | UCU→UUU      | S→F                   |
|              | 830                 | 277                 | 2                             | C→U             | UCA→UUA      | S→L                   |
|              | 836                 | 279                 | 2                             | C→U             | UCA→UUA      | S→L                   |
|              | 1481                | 494                 | 2                             | C→U             | CCA→CUA      | P→L                   |
| <i>ndhF</i>  | 290                 | 97                  | 2                             | C→U             | UCA→UUA      | S→L                   |
| <i>ndhD</i>  | 2                   | 1                   | 2                             | C→U             | ACG→AUG      | T→M                   |
|              | 383*                | 128                 | 2                             | C→U             | UCG→UUG      | S→L                   |
|              | 599                 | 200                 | 2                             | C→U             | UCA→UUA      | S→L                   |
|              | 674                 | 225                 | 2                             | C→U             | UCG→UUG      | S→L                   |
|              | 878                 | 293                 | 2                             | C→U             | UCA→UUA      | S→L                   |
|              | 1298                | 433                 | 2                             | C→U             | UCA→UUA      | S→L                   |
| <i>ndhA</i>  | 41                  | 114                 | 2                             | C→U             | UCA→UUA      | S→L                   |
|              | 961                 | 321                 | 1                             | C→U             | CCU→UCU      | P→S                   |
|              | 1073                | 358                 | 2                             | C→U             | UCC→UUC      | S→F                   |

\*The Prediction of RNA editing site in *ndhD* (383) were found only in *C. monoica*.

**Table S6.** Repeat sequences present in the *C. monoica* chloroplast genome.

| SN | Repeat<br>Size | Repeat<br>Position 1 | Repeat<br>Type | Repeat<br>Location 1 | Repeat<br>Position 2 | Repeat<br>Location 2 | E-Value    |
|----|----------------|----------------------|----------------|----------------------|----------------------|----------------------|------------|
| 1  | 131            | 53132                | P              | IGS                  | 57844                | IGS                  | 0 8.75e-70 |
| 2  | 109            | 91875                | F              | ycf2                 | 91893                | ycf2                 | 0 1.54e-56 |
| 3  | 109            | 91875                | P              | ycf2                 | 143623               | ycf2                 | 0 1.54e-56 |
| 4  | 109            | 91893                | P              | ycf2                 | 143641               | ycf2                 | 0 1.54e-56 |
| 5  | 109            | 143623               | F              | ycf2                 | 143641               | ycf2                 | 0 1.54e-56 |
| 6  | 91             | 91875                | F              | ycf2                 | 91911                | ycf2                 | 0 1.06e-45 |
| 7  | 91             | 91875                | P              | ycf2                 | 143623               | ycf2                 | 0 1.06e-45 |
| 8  | 91             | 91911                | P              | ycf2                 | 143659               | ycf2                 | 0 1.06e-45 |
| 9  | 91             | 143623               | F              | ycf2                 | 143659               | ycf2                 | 0 1.06e-45 |
| 19 | 73             | 91875                | F              | ycf2                 | 91929                | ycf2                 | 0 7.27e-35 |
| 11 | 73             | 91875                | P              | ycf2                 | 143623               | ycf2                 | 0 7.27e-35 |
| 12 | 73             | 91929                | P              | ycf2                 | 143677               | ycf2                 | 0 7.27e-35 |
| 13 | 73             | 143623               | F              | ycf2                 | 143677               | ycf2                 | 0 7.27e-35 |
| 14 | 55             | 91875                | F              | ycf2                 | 91947                | ycf2                 | 0 4.99e-24 |
| 15 | 55             | 91875                | P              | ycf2                 | 143623               | ycf2                 | 0 4.99e-24 |
| 16 | 55             | 91947                | P              | ycf2                 | 143695               | ycf2                 | 0 4.99e-24 |
| 17 | 55             | 143623               | F              | ycf2                 | 143695               | ycf2                 | 0 4.99e-24 |
| 18 | 52             | 90299                | F              | ycf2                 | 90431                | ycf2                 | 0 3.20e-22 |
| 19 | 52             | 90299                | P              | ycf2                 | 145142               | ycf2                 | 0 3.20e-22 |
| 20 | 52             | 90431                | P              | ycf2                 | 145274               | ycf2                 | 0 3.20e-22 |
| 21 | 52             | 145142               | F              | ycf2                 | 145274               | ycf2                 | 0 3.20e-22 |
| 22 | 44             | 73850                | P              | IGS                  | 73850                | IGS                  | 0 2.09e-17 |
| 23 | 39             | 44505                | F              | ycf3 - intron        | 81274                | rpl16 - intron       | 0 2.14e-14 |
| 24 | 39             | 85766                | F              | IGS                  | 85802                | IGS                  | 0 2.14e-14 |
| 25 | 39             | 85766                | P              | IGS                  | 149784               | IGS                  | 0 2.14e-14 |
| 26 | 39             | 85802                | P              | IGS                  | 149820               | IGS                  | 0 2.14e-14 |
| 27 | 39             | 149784               | F              | IGS                  | 149820               | IGS                  | 0 2.14e-14 |
| 28 | 38             | 58729                | F              | accD                 | 58768                | accD                 | 0 8.58e-14 |
| 29 | 37             | 91875                | F              | ycf2                 | 91965                | ycf2                 | 0 3.43e-13 |
| 30 | 37             | 91875                | P              | ycf2                 | 143623               | ycf2                 | 0 3.43e-13 |
| 31 | 37             | 91965                | P              | ycf2                 | 143713               | ycf2                 | 0 3.43e-13 |
| 32 | 37             | 143623               | F              | ycf2                 | 143713               | ycf2                 | 0 3.43e-13 |
| 33 | 35             | 90394                | F              | ycf2                 | 90412                | ycf2                 | 0 5.49e-12 |
| 34 | 35             | 90394                | P              | ycf2                 | 145178               | ycf2                 | 0 5.49e-12 |
| 35 | 35             | 90412                | P              | ycf2                 | 145196               | ycf2                 | 0 5.49e-12 |
| 36 | 35             | 145178               | F              | ycf2                 | 145196               | ycf2                 | 0 5.49e-12 |
| 37 | 34             | 68896                | F              | rps18                | 68917                | rps18                | 0 2.20e-11 |
| 38 | 33             | 88040                | F              | ycf2                 | 88115                | ycf2                 | 0 8.78e-11 |
| 39 | 33             | 88040                | P              | ycf2                 | 147477               | ycf2                 | 0 8.78e-11 |
| 40 | 33             | 88115                | P              | ycf2                 | 147552               | ycf2                 | 0 8.78e-11 |
| 41 | 33             | 147477               | F              | ycf2                 | 147552               | ycf2                 | 0 8.78e-11 |
| 42 | 31             | 58717                | F              | accD                 | 58795                | accD                 | 0 1.41e-09 |
| 43 | 29             | 8210                 | P              | IGS                  | 46026                | trnS-GGA             | 0 2.25e-08 |
| 44 | 29             | 39587                | F              | psaB                 | 41811                | psaA                 | 0 2.25e-08 |
| 45 | 28             | 91816                | F              | ycf2                 | 91879                | ycf2                 | 0 9.00e-08 |
| 46 | 28             | 91816                | F              | ycf2                 | 91897                | ycf2                 | 0 9.00e-08 |
| 47 | 28             | 91816                | F              | ycf2                 | 91915                | ycf2                 | 0 9.00e-08 |
| 48 | 28             | 91816                | F              | ycf2                 | 91933                | ycf2                 | 0 9.00e-08 |
| 49 | 28             | 91816                | F              | ycf2                 | 91951                | ycf2                 | 0 9.00e-08 |

**Table S7.** Repeat sequences present in the *C. sinensis* chloroplast genome.

| SN | Repeat<br>Size | Repeat<br>Position 1 | Repeat<br>Type | Repeat<br>Location 1 | Repeat<br>Position 2 | Repeat<br>Location 2 | E-Value    |
|----|----------------|----------------------|----------------|----------------------|----------------------|----------------------|------------|
| 1  | 109            | 92151                | F              | ycf2                 | 92169                | ycf2                 | 0 1.54e-56 |
| 2  | 109            | 92151                | P              | ycf2                 | 143896               | ycf2                 | 0 1.54e-56 |
| 3  | 109            | 92169                | P              | ycf2                 | 143914               | ycf2                 | 0 1.54e-56 |
| 4  | 109            | 143896               | F              | ycf2                 | 143914               | ycf2                 | 0 1.54e-56 |
| 5  | 91             | 92151                | F              | ycf2                 | 92187                | ycf2                 | 0 1.06e-45 |
| 6  | 91             | 92151                | P              | ycf2                 | 143896               | ycf2                 | 0 1.06e-45 |
| 7  | 91             | 92187                | P              | ycf2                 | 143932               | ycf2                 | 0 1.06e-45 |
| 8  | 91             | 143896               | F              | ycf2                 | 143932               | ycf2                 | 0 1.06e-45 |
| 9  | 73             | 58690                | F              | accD                 | 58729                | accD                 | 0 7.29e-35 |
| 19 | 73             | 92151                | F              | ycf2                 | 92205                | ycf2                 | 0 7.29e-35 |
| 11 | 73             | 92151                | P              | ycf2                 | 143896               | ycf2                 | 0 7.29e-35 |
| 12 | 73             | 92205                | P              | ycf2                 | 143950               | ycf2                 | 0 7.29e-35 |
| 13 | 73             | 143896               | F              | ycf2                 | 143950               | ycf2                 | 0 7.29e-35 |
| 14 | 65             | 53085                | P              | IGS                  | 57871                | IGS                  | 0 4.78e-30 |
| 15 | 55             | 92151                | F              | ycf2                 | 92223                | ycf2                 | 0 5.01e-24 |
| 16 | 55             | 92151                | P              | ycf2                 | 143896               | ycf2                 | 0 5.01e-24 |
| 17 | 55             | 92223                | P              | ycf2                 | 143968               | ycf2                 | 0 5.01e-24 |
| 18 | 55             | 143896               | F              | ycf2                 | 143968               | ycf2                 | 0 5.01e-24 |
| 19 | 52             | 90575                | F              | ycf2                 | 90707                | ycf2                 | 0 3.21e-22 |
| 20 | 52             | 90575                | P              | ycf2                 | 145415               | ycf2                 | 0 3.21e-22 |
| 21 | 52             | 90707                | P              | ycf2                 | 145547               | ycf2                 | 0 3.21e-22 |
| 22 | 52             | 145415               | F              | ycf2                 | 145547               | ycf2                 | 0 3.21e-22 |
| 23 | 45             | 58788                | F              | accD                 | 58827                | accD                 | 0 5.25e-18 |
| 24 | 44             | 74149                | P              | IGS                  | 74149                | IGS                  | 0 2.10e-17 |
| 25 | 39             | 44469                | F              | ycf3                 | 81585                | rp116 - intron       | 0 2.15e-14 |
| 26 | 37             | 53151                | P              | IGS                  | 57833                | IGS                  | 0 3.44e-13 |
| 27 | 37             | 92151                | F              | ycf2                 | 92241                | ycf2                 | 0 3.44e-13 |
| 28 | 37             | 92151                | P              | ycf2                 | 143896               | ycf2                 | 0 3.44e-13 |
| 29 | 37             | 92241                | P              | ycf2                 | 143986               | ycf2                 | 0 3.44e-13 |
| 30 | 37             | 143896               | F              | ycf2                 | 143986               | ycf2                 | 0 3.44e-13 |
| 31 | 35             | 53202                | F              | IGS                  | 57805                | IGS                  | 0 5.51e-12 |
| 32 | 34             | 58690                | F              | accD                 | 58768                | accD                 | 0 2.20e-11 |
| 33 | 34             | 69200                | F              | rps18                | 69221                | rps18                | 0 2.20e-11 |
| 34 | 33             | 88316                | F              | ycf2                 | 88391                | ycf2                 | 0 8.81e-11 |
| 35 | 33             | 88316                | P              | ycf2                 | 147750               | ycf2                 | 0 8.81e-11 |
| 36 | 33             | 88391                | P              | ycf2                 | 147825               | ycf2                 | 0 8.81e-11 |
| 37 | 33             | 147750               | F              | ycf2                 | 147825               | ycf2                 | 0 8.81e-11 |
| 38 | 29             | 8223                 | P              | IGS                  | 45984                | trnS-GGA             | 0 2.26e-08 |
| 39 | 29             | 39556                | F              | psaB                 | 41780                | psaA                 | 0 2.26e-08 |
| 40 | 28             | 92092                | F              | ycf2                 | 92155                | ycf2                 | 0 9.02e-08 |
| 41 | 28             | 92092                | F              | ycf2                 | 92173                | ycf2                 | 0 9.02e-08 |
| 42 | 28             | 92092                | F              | ycf2                 | 92191                | ycf2                 | 0 9.02e-08 |
| 43 | 28             | 92092                | F              | ycf2                 | 92209                | ycf2                 | 0 9.02e-08 |
| 44 | 28             | 92092                | F              | ycf2                 | 92227                | ycf2                 | 0 9.02e-08 |
| 45 | 28             | 92092                | F              | ycf2                 | 92245                | ycf2                 | 0 9.02e-08 |
| 46 | 28             | 92092                | P              | ycf2                 | 143901               | ycf2                 | 0 9.02e-08 |
| 47 | 28             | 92092                | P              | ycf2                 | 143919               | ycf2                 | 0 9.02e-08 |
| 48 | 28             | 92092                | P              | ycf2                 | 143937               | ycf2                 | 0 9.02e-08 |
| 49 | 28             | 92092                | P              | ycf2                 | 143955               | ycf2                 | 0 9.02e-08 |

**Table S8.** Simple sequence repeats in the chloroplast genome of *C. monoica*

| Repeat | Length (bp) | Number | Start position                                                                                                                                                                                                                      |
|--------|-------------|--------|-------------------------------------------------------------------------------------------------------------------------------------------------------------------------------------------------------------------------------------|
| A      | 8           | 24     | 99; 9205; 18832; 21290; 22497; 28979; 29893; 37168; 37340; 47697; 63589; 63596; 65185; 66160; 82245; 89723; 92659; 96064; 108910; 109603; 113220; 133807; 137550; 151728                                                            |
|        | 9           | 18     | 1581; 4197; 13679; 37168; 37478; 38204; 46172; 47125; 57606; 64394; 64451; 64642; 70009; 88737; 111654; 114148; 138852; 151728                                                                                                      |
|        | 10          | 8      | 4606; 55177; 55590; 68800; 80746; 82092; 112592; 115721                                                                                                                                                                             |
|        | 11          | 4      | 43114; 60721; 69327; 151728                                                                                                                                                                                                         |
|        | 12          | 4      | 8181; 66398; 74939; 8181                                                                                                                                                                                                            |
|        | 13          | 1      | 31826                                                                                                                                                                                                                               |
|        | 14          | 1      | 33329                                                                                                                                                                                                                               |
|        | 17          | 1      | 45632                                                                                                                                                                                                                               |
|        |             |        |                                                                                                                                                                                                                                     |
| C      | 8           | 3      | 146864; 19301; 22627                                                                                                                                                                                                                |
|        | 9           | 1      | 37478                                                                                                                                                                                                                               |
|        | 10          | 1      | 142763                                                                                                                                                                                                                              |
| G      | 8           | 4      | 4606; 35094; 76550; 88737                                                                                                                                                                                                           |
|        | 10          | 1      | 92854                                                                                                                                                                                                                               |
| T      | 8           | 32     | 4468; 4606; 7574; 7781; 13096; 16801; 27284; 43114; 43701; 44197; 49527; 50923; 51434; 52566; 60958; 61693; 66977; 70009; 73617; 79608; 82092; 83821; 98069; 101812; 114734; 124265; 124393; 124839; 124993; 139555; 142960; 145896 |
|        | 9           | 21     | 4606; 28762; 30526; 32426; 33076; 36302; 45104; 61693; 71970; 74420; 83127; 83514; 83821; 96766; 114035; 121722; 124265; 124561; 124640; 125414; 146864                                                                             |
|        | 10          | 7      | 8691; 12305; 16511; 77769; 81489; 121563; 126617                                                                                                                                                                                    |
|        | 11          | 2      | 9634; 83821                                                                                                                                                                                                                         |
|        | 12          | 2      | 60009; 119235                                                                                                                                                                                                                       |
|        | 13          | 4      | 18689; 65928; 80207; 112592                                                                                                                                                                                                         |
|        | 14          | 1      | 111488                                                                                                                                                                                                                              |
|        | 18          | 1      | 51766                                                                                                                                                                                                                               |
|        |             |        |                                                                                                                                                                                                                                     |
| AT     | 5           | 1      | 20062                                                                                                                                                                                                                               |
| TA     | 5           | 1      | 43114                                                                                                                                                                                                                               |
| AAAC   | 3           | 1      | 68800                                                                                                                                                                                                                               |
| AATA   | 3           | 1      | 108910                                                                                                                                                                                                                              |
| ACAA   | 3           | 1      | 112006                                                                                                                                                                                                                              |
| CTTT   | 3           | 1      | 43840                                                                                                                                                                                                                               |
| GAAA   | 2           | 1      | 119235                                                                                                                                                                                                                              |
| TAAA   | 3           | 1      | 149501                                                                                                                                                                                                                              |
| TATT   | 3           | 1      | 55590                                                                                                                                                                                                                               |
| TTAA   | 3           | 1      | 30392                                                                                                                                                                                                                               |
| TTGA   | 3           | 1      | 14550                                                                                                                                                                                                                               |
| TTTA   | 3           | 2      | 9851; 86114                                                                                                                                                                                                                         |
| TATTT  | 3           | 1      | 47572                                                                                                                                                                                                                               |



**Table S9.** Simple sequence repeats in the chloroplast genome of *C. sinensis*

| Repeat | Length (bp) | Number | Start position                                                                                                                                                                                                                                                  |
|--------|-------------|--------|-----------------------------------------------------------------------------------------------------------------------------------------------------------------------------------------------------------------------------------------------------------------|
| A      | 8           | 25     | 9209; 18819; 21277; 22484; 28994; 29908; 37138; 37310; 57561; 60762; 63631; 65487; 66463; 75238; 82556; 89999; 92935; 96338; 109188; 109881; 113497; 117591; 134082; 137825; 151965                                                                             |
|        | 9           | 13     | 4623; 37138; 38173; 45417; 47084; 69105; 70315; 81058; 82403; 89013; 114312; 139127; 151965                                                                                                                                                                     |
|        | 10          | 7      | 13672; 37447; 43084; 46130; 55504; 64943; 115990                                                                                                                                                                                                                |
|        | 11          | 7      | 100; 4177; 8195; 31804; 64691; 64752; 73917                                                                                                                                                                                                                     |
|        | 12          | 3      | 55130; 66702; 151965                                                                                                                                                                                                                                            |
|        | 13          | 2      | 1589; 69631                                                                                                                                                                                                                                                     |
|        | 14          | 3      | 4177; 33306; 45601                                                                                                                                                                                                                                              |
|        | 15          | 1      | 112864                                                                                                                                                                                                                                                          |
| C      | 8           | 5      | 19288; 22614; 37447; 143038; 147137                                                                                                                                                                                                                             |
| G      | 8           | 3      | 35065; 89013; 93130                                                                                                                                                                                                                                             |
| T      | 8           | 36     | 4485; 4623; 7588; 7795; 12310; 13098; 16788; 27272; 28778; 36273; 43084; 43667; 44161; 49120; 49484; 50877; 52519; 55504; 60999; 67281; 68758; 69631; 70315; 73917; 79921; 84132; 98343; 102086; 115003; 124536; 124664; 125110; 125264; 139830; 143233; 146169 |
|        | 9           | 19     | 8696; 32402; 51729; 66584; 72270; 74719; 82403; 83438; 83825; 84132; 97040; 114312; 121835; 121993; 124536; 124832; 124911; 125685; 147137                                                                                                                      |
|        | 10          | 9      | 16498; 30546; 60436; 61734; 78082; 81800; 111766; 119505; 126888                                                                                                                                                                                                |
|        | 11          | 2      | 9638; 51388                                                                                                                                                                                                                                                     |
|        | 12          | 4      | 45074; 60048; 80520; 84132                                                                                                                                                                                                                                      |
|        | 13          | 2      | 18676; 112864                                                                                                                                                                                                                                                   |
|        | 14          | 1      | 66230                                                                                                                                                                                                                                                           |
| AT     | 5           | 1      | 20049                                                                                                                                                                                                                                                           |
| TA     | 5           | 1      | 43084                                                                                                                                                                                                                                                           |
| AAAC   | 3           | 1      | 69105                                                                                                                                                                                                                                                           |
| AATA   | 3           | 1      | 109188                                                                                                                                                                                                                                                          |
| ACAA   | 3           | 1      | 112278                                                                                                                                                                                                                                                          |
| CTTT   | 3           | 1      | 43806                                                                                                                                                                                                                                                           |
| GAAA   | 3           | 1      | 119505                                                                                                                                                                                                                                                          |
| GGCA   | 3           | 1      | 6529                                                                                                                                                                                                                                                            |
| TAAA   | 3           | 1      | 149774                                                                                                                                                                                                                                                          |
| TATT   | 3           | 1      | 55504                                                                                                                                                                                                                                                           |
| TTAA   | 3           | 1      | 30412                                                                                                                                                                                                                                                           |
| TTTA   | 3           | 2      | 9856; 86390                                                                                                                                                                                                                                                     |
